# Supplementary material
Source: PubMed Central journal article supplement (PMC4908219)
Supplement: mmc1.pdf [file mmc1.pdf]

**Supplemental Data**

**A Recurrent Mosaic Mutation in *SMO*,  
Encoding the Hedgehog Signal Transducer Smoothened,  
Is the Major Cause of Curry-Jones Syndrome**

**Stephen R.F. Twigg, Robert B. Hufnagel, Kerry A. Miller, Yan Zhou, Simon J. McGowan, John Taylor, Jude Craft, Jenny C. Taylor, Stephanie L. Santoro, Taosheng Huang, Robert J. Hopkin, Angela F. Brady, Jill Clayton-Smith, Carol L. Clericuzio, Dorothy K. Grange, Leopold Groesser, Christian Hafner, Denise Horn, I. Karen Temple, William B. Dobyns, Cynthia J. Curry, Marilyn C. Jones, and Andrew O.M. Wilkie**

## Supplemental Note: Clinical report

### Subject 8

This female child was assessed at the age of 2 years. She had been born at 36 weeks' gestation to a 29 year old G3P2 mother and a 28 year old father. Fetal MRI was performed at 29 weeks' gestation because of occipital cystic swellings observed on a previous ultrasound scan. The MRI demonstrated facial abnormalities, abnormal right calvarial shape and frontal lobe sulcation, consistent with craniosynostosis, unilateral right microcephaly, and focal polymicrogyria. Occipital scalp lymphangiomas and bowel malrotation were also noted. At birth, she was noted to have facial asymmetry and duplicated syndactylous thumbs and halluces with variable syndactyly of digits 1-3 in all extremities. Dysmorphic features included scalp lymphangiomas, frontal bossing, flat nasal bridge, midface retrusion, prominent chin, and large ears. Postnatal brain MRI confirmed the prenatal findings, with the addition of cavum septum pellucidum with intact corpus callosum. Head computed tomography (CT) revealed extensive right coronal craniosynostosis, accessory bone at the anterior fontanelle, wormian bones of the left posterior skull, enlarged right lateral ventricle, and prominent extra-axial spaces. The scalp lymphangiomas were excised shortly after birth, and histologically described as hamartomatous lesions with features of lymphangioma and nevus sebaceus.

Early feeding difficulties prompted further investigation and bowel malrotation was discovered, requiring band division (Ladd's procedure) and ileostomy, which was later reversed. Serosal nodules noted in the duodenum, appendix, and mesentery were pathologically characterized as hamartomatous with fibrovascular and neuromuscular components. Subsequently, she has had extensive malabsorption, diarrhea, and intermittent pseudo-obstruction. Vesicoureteral reflux from birth caused frequent urinary tract infections. Although not present at birth, by 6 months of age linear areas of pigmentary mosaicism were evident over the extremities and trunk, while sparing the face and scalp; based on the failure to tan normally, the affected skin appeared to be the hypopigmented and atrophic component. Around 1.5 years of age, she was noted to have significant leg length discrepancy, left greater than right, and lumbar scoliosis. Her development has progressed well despite her complex problems, and she is walking, speaking in two word sentences, has pincer grasp, and is socially engaged. Currently, her height, weight, and head circumference are within the normal range.

Genetic testing results, including karyotype, SNP-based microarray, chromosome breakage studies, sequencing and deletion/duplication testing of *RECQL4*, *TWIST*, *FGFR1*, and *FGFR2*, selective mutational analysis of *FGFR3*, and clinical whole exome sequencing from blood-derived DNA did not indicate disease-causing mutations accounting for her phenotype.

Figure S1. *SMO* is the top hit in an analysis of variant allele frequency differences in two samples from Subject 1.

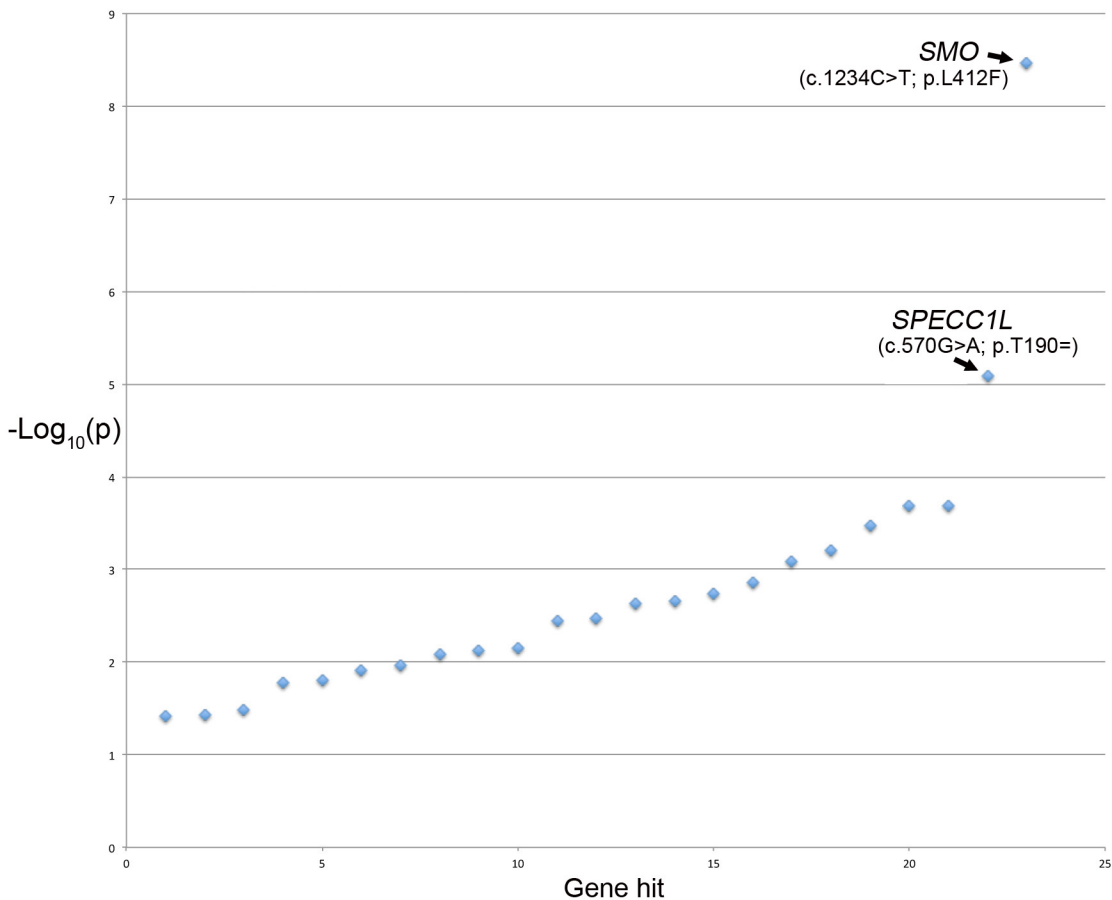

The exome data from Subject 1 (samples 1-2 and 1-4) was analysed using MiG (Multi-Image Genome viewer; McGowan et al., 2013). Only variants within exons and at positions with read depths greater than or equal to 20 were considered. A p-value threshold of 0.05 was used in the calling of somatic sites (threshold below which read count differences between two samples were deemed nominally significant). The variant frequency cutoff applied to the data was  $\leq 15\%$  in one tissue, and  $\geq 30\%$  in the other tissue, and vice versa. The 23 variant hits are shown plotted against  $-\text{Log}_{10}(p)$ .

Figure S2. Exome sequence of *SMO* exon 6 from Subject 2.

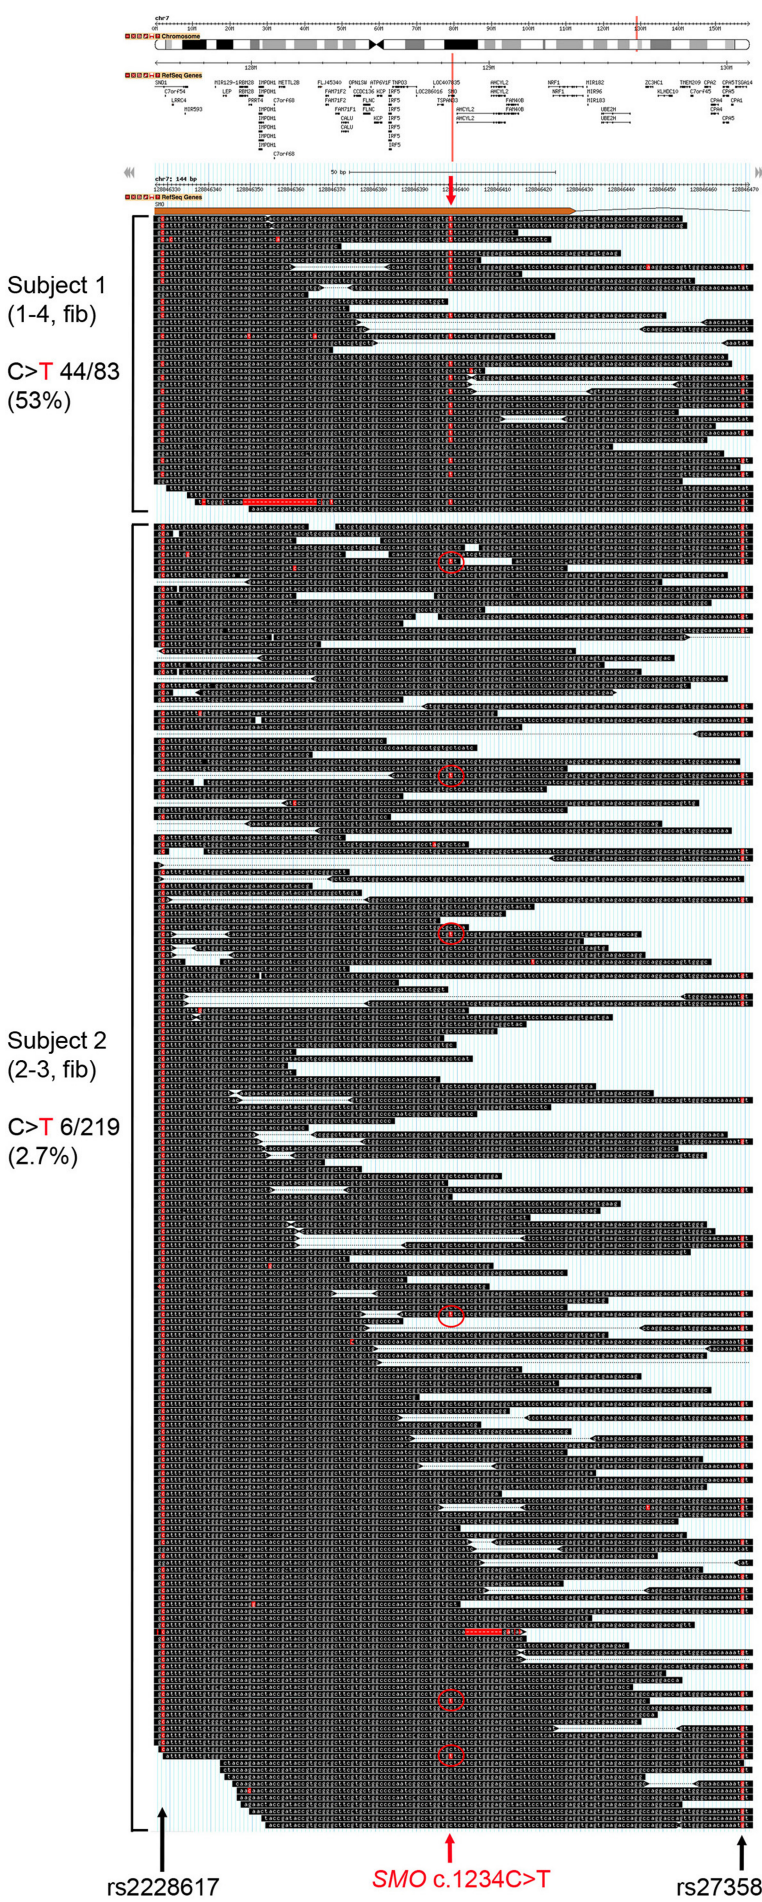

Exome sequencing reads, visualized in GBrowse, aligned to *SMO* exon 6 from Subject 1 (sample 1-4, not all reads are shown) shown above, and Subject 2 (sample 2-3), below. The red arrow indicates the 1234C>T mutation position. Mutant T reads in Subject 2 (6/219 reads) are circled for clarity and make up 2.7% of nucleotides at this position. The two flanking SNPs, rs2228617 upstream and rs2735842 downstream, are indicated by black arrows, and are both homozygous for the variant allele in Subject 2. The uppermost panel shows the position of *SMO*, and nearby genes, on chromosome 7q32.1.



Figure S3. Magnetic resonance imaging of brains of Subjects 5, 6 and 8.

### Subject 5

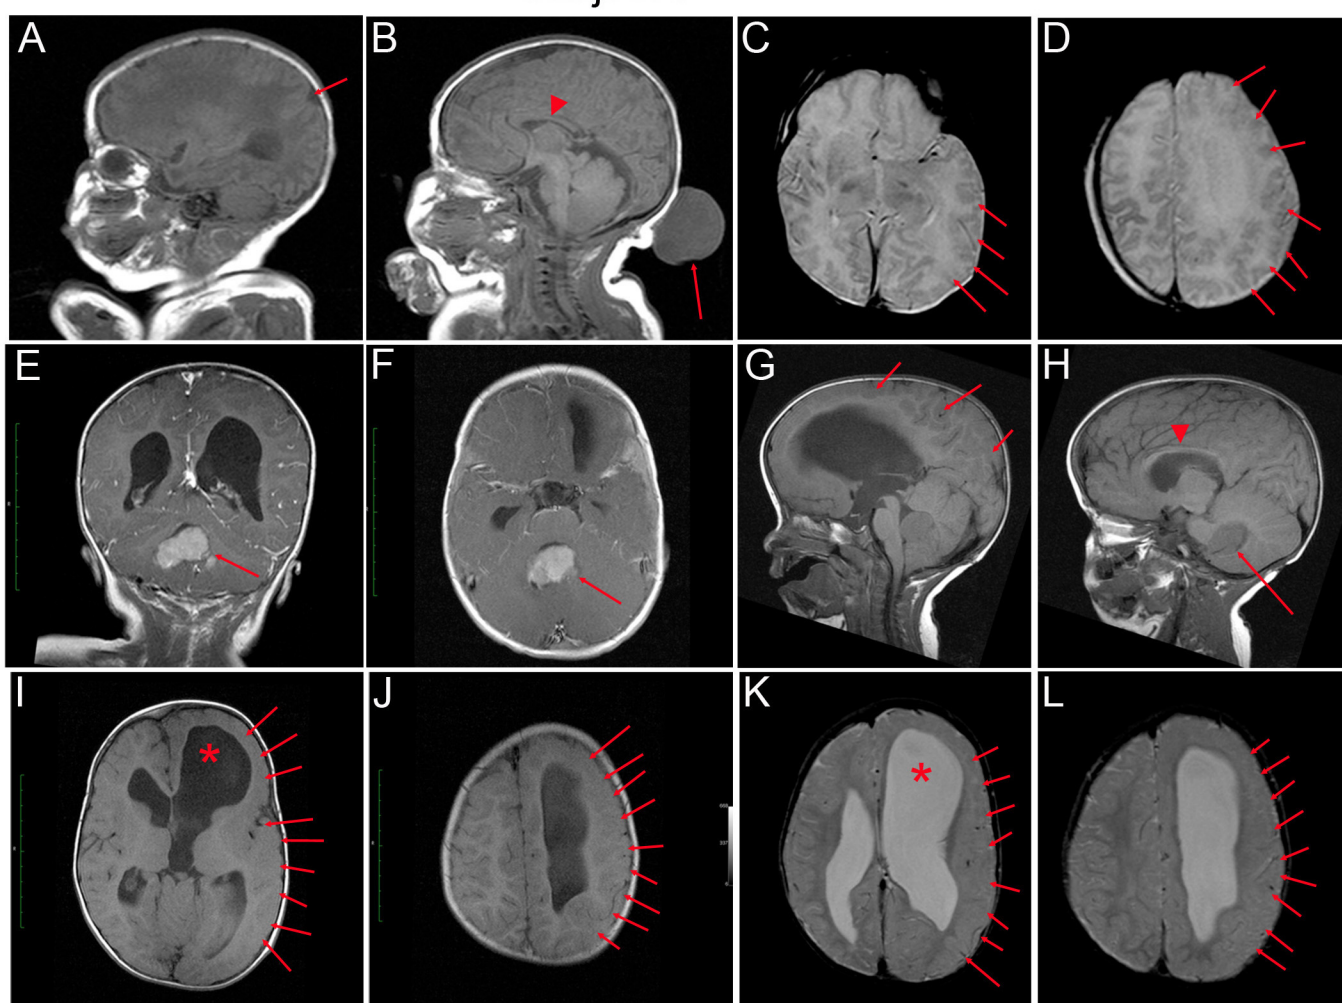

### Subject 6

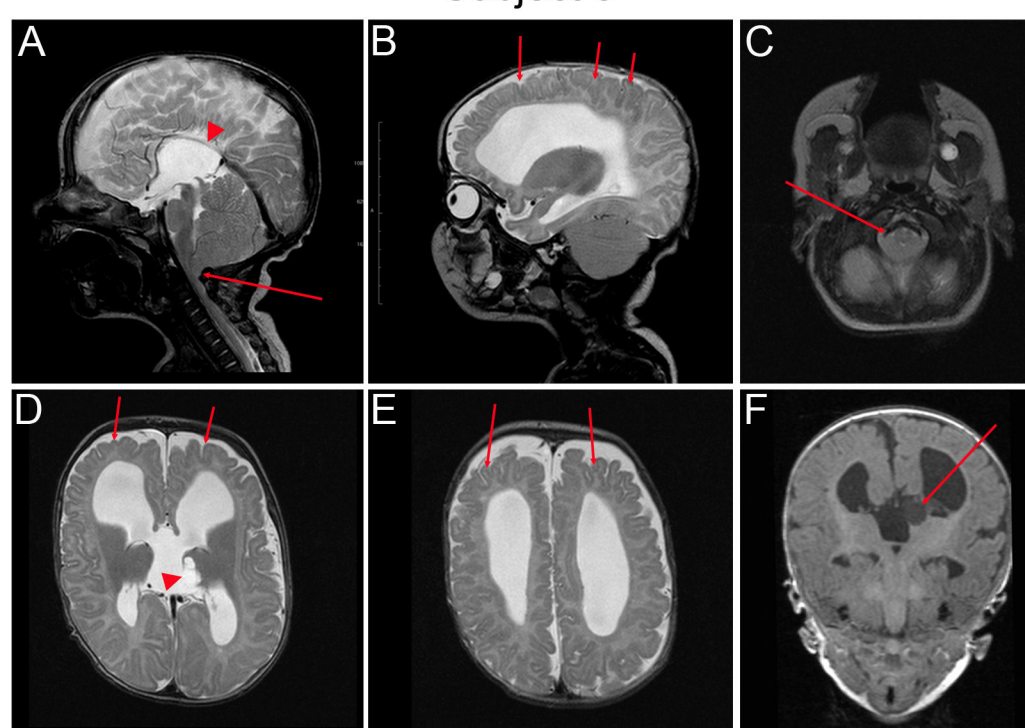

### Subject 8

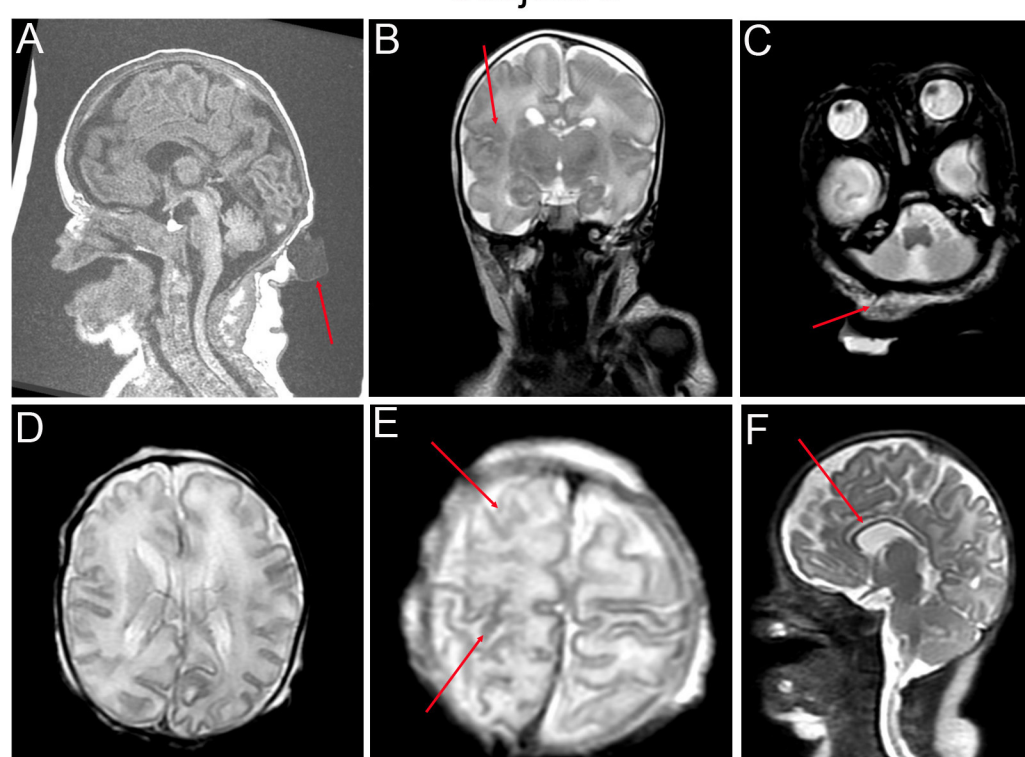

Top, brain MRI from Subject 5 aged 1 day (A-D) and 1 year 5 months (E-L). At 1 day the 4th ventricle is small and pinched with moderate cerebellar ectopia filling the low posterior fossa (B); in the second scan this has evolved to a more severe Chiari I malformation (G). In A and G note macrocephaly with prominent forehead and narrow extra-axial spaces. In B, the corpus callosum is shortened with absent rostrum and splenium consistent with partial agenesis (ACC, arrowhead, see also image H); note also a 3-4 cm occipital encephalocele connecting to the low posterior fossa (arrow, resected in the later set of images). In C,D,I-L note left hemimegalencephaly (HMEG) and ventriculomegaly (asterisks) with dysplastic cortex over part or all of the enlarged hemisphere with irregular gyral pattern and microgyri (arrows, also in A,G), consistent with polymicrogyria or classic HMEG. A single periventricular nodular heterotopia in the anterior-lateral body of the left lateral ventricle was also seen. In E and F, note large 2-3 cm contrast-enhancing tumour in the right cerebellar hemisphere and 4th ventricle (desmoplastic medulloblastoma also visible in H, arrows).

Middle, brain MRI from Subject 6 aged 3 months showing normal head size and extra axial spaces. In A, note very short and thin corpus callosum consistent with partial ACC (arrowhead), normal brainstem and cerebellar structures, but severe cerebellar tonsillar ectopia filling low posterior fossa and associated Chiari 1 malformation (arrow). In B there are small gyri, shallow sulci and subtle pebbling of cortex white matter border consistent with delicate polymicrogyria (arrows). C shows the cerebellar tonsils wrapped around low medulla (arrow). D, subtle abnormalities of gyri and cortex (arrows), cyst in left thalamus (arrowhead) that connects with 3rd ventricle-midline cyst. E, diffuse, small gyri and shallow sulci (most obvious in frontal lobes, arrows), with subtle pebbling of the cortex-white matter border. F, arrow indicates the cyst in the left thalamus.

Bottom, brain MRI from Subject 8 aged 1 day (A-E) and 19 days (F). A, note prominent forehead, turricephaly, hypoplastic cerebellum and occipital cyst (arrow). In B, simplified gyral pattern bilaterally and subtle cortex irregularity (indicated by the arrow in the right perisylvian region). C, base of the brain showing surface tissue thickening at position of lymphangiomatous malformation (arrow). D, mild hemisphere asymmetry (left>right) with too few gyri on both sides and subtle cortex irregularity. E, delicate polymicrogyria on right side only (arrows). F, thin corpus callosum (arrow) consistent with mild ACC, large 1 x 1.5 cm cavum septi pellucidi. The lymphangiomatous malformation has been resected.

**Table S1 Genes for which rare coding variants were called in two of the samples analyzed by exome sequencing**

| Gene                       | Chr | Position | Reference  |    | Variant |            | Function | Nucleotide and amino acid change | Subject                    |                                                |   |
|----------------------------|-----|----------|------------|----|---------|------------|----------|----------------------------------|----------------------------|------------------------------------------------|---|
|                            |     |          | Reads      |    | Reads   |            |          |                                  |                            |                                                |   |
|                            |     |          | F          | R  | F       | R          |          |                                  |                            |                                                |   |
| <i>CREBBP</i> <sup>a</sup> | 16  | 3779774  | -          | 8  | 1       | TCA        | 5        | 0                                | nonframeshift insertion    | NM_004380; c.5271_5272insGAT:p.G1757_E1758insD | 3 |
| <i>CREBBP</i>              | 16  | 3828048  | G          | 43 | 25      | C          | 37       | 19                               | nonsynonymous SNV          | NM_004380; c. 2077C>G:p.P693A                  | 4 |
| <i>DNAH17</i> <sup>b</sup> | 17  | 76464741 | T          | 53 | 25      | C          | 50       | 24                               | synonymous SNV             | NM_173628; c. 8763A>G:p.T2912=                 | 4 |
| <i>DNAH17</i>              | 17  | 76556949 | C          | 1  | 9       | T          | 1        | 5                                | nonsynonymous SNV          | NM_173628; c. 1904G>A:p.C635Y                  | 3 |
| <i>CRIPAK</i> <sup>c</sup> | 4   | 1388318  | -          | 14 | 29      | CACAC      | 9        | 21                               | frameshift insertion       | artifact                                       | 4 |
| <i>CRIPAK</i>              | 4   | 1388944  | GTGGAGTGTT | 3  | 1       | ATGGAGTGCC | 5        | 0                                | nonframeshift substitution | artifact                                       | 2 |

Note.— Filters: Exome Variant Server and 1000 genomes allele frequency  $\leq 0.0001$ , no minimum deleterious score (for nonsynonymous substitutions), minimum variant read depth = 4, exclude variants from solved in-house data. We retained variants of all categories that were called in 25-75% of reads. This generated a final list of 1127 variants. The list shown here was generated after further filtering against the Exome Aggregation Consortium dataset (allele frequency  $\leq 0.00001$ ) and the 3 genes with coding variants shared by two cases are shown in the Table above. Platypus did not call *SMO* c.1234C>T in Subjects 2 and 3 owing to their very low frequencies.

<sup>a</sup>excluded because heterozygous loss-of function mutations cause Rubinstein-Taybi syndrome (MIM: 180849).

<sup>b</sup>excluded because one of the variants is synonymous.

<sup>c</sup>excluded because both the sequence changes are artifacts.

**Table S2 Deep sequencing of *SMO* c.1234C>T in CJS samples – read depths and percentage mutant allele**

| Subject | Tissue sample    |                     | C allele                     | T allele | % T allele |             |
|---------|------------------|---------------------|------------------------------|----------|------------|-------------|
|         | ID               | Source <sup>b</sup> |                              |          |            |             |
| 1*      | 1-1              | 2244                | blood                        | 3579     | 3          | 0.08        |
|         | 1-2 <sup>a</sup> | 2245                | eyelid                       | 17507    | 2145       | <b>10.9</b> |
|         | 1-3              | 6292                | skin                         | 3474     | 0          | 0           |
|         | 1-4 <sup>a</sup> | 6291                | fib (1-3)                    | 1013     | 975        | <b>49.0</b> |
| 2*      | 2-1              | 1280                | skin                         | 24106    | 7827       | <b>24.5</b> |
|         | 2-2              | 6736                | skin                         | 27755    | 9          | 0.03        |
|         | 2-3 <sup>a</sup> | 3082                | fib (2-1)                    | 2650     | 109        | <b>3.95</b> |
|         | 2-4              | 6737                | fib (2-2)                    | 14626    | 767        | <b>4.98</b> |
|         | 2-5              | 6845                | bowel <sup>c</sup>           | 40869    | 201        | 0.49        |
| 3*      | 3-1              | 6942                | skin                         | 38264    | 6040       | <b>13.6</b> |
|         | 3-2 <sup>a</sup> | 2252                | fib                          | 6455     | 3          | 0.05        |
|         | 3-3              | 6943                | fib (3-1)                    | 3940     | 12         | 0.30        |
|         | 3-4              | 6640                | saliva                       | 2510     | 42         | <b>1.65</b> |
| 4       | 4-1 <sup>a</sup> | 5843                | blood                        | 2310     | 0          | 0           |
|         | 4-2              | 6723                | saliva                       | 1850     | 2          | 0.11        |
| 5*      | 5-1              | 6628                | blood                        | 17577    | 6          | 0.03        |
|         | 5-2              | 6629                | saliva                       | 39146    | 3000       | <b>7.12</b> |
|         | 5-3              | 6702                | meningocele <sup>c</sup>     | 15364    | 3806       | <b>19.8</b> |
|         | 5-4              | 6703                | medulloblastoma <sup>c</sup> | 12745    | 9600       | <b>43.0</b> |
| 6*      | 6-1              | 6847                | skin <sup>c</sup>            | 6306     | 952        | <b>13.1</b> |

  

| Subject | Tissue sample |        | C allele                     | T allele | % T allele |             |
|---------|---------------|--------|------------------------------|----------|------------|-------------|
|         | ID            | Source |                              |          |            |             |
| 6*      | 6-2           | 6838   | saliva                       | 19924    | 1137       | <b>5.40</b> |
|         | 6-3           | 6862   | abdominal tumor <sup>c</sup> | 1711     | 993        | <b>36.7</b> |
|         | 6-4           | 6867   | abdominal tumor <sup>c</sup> | 5295     | 2862       | <b>35.1</b> |
| 7*      | 7-1           | 7039A  | skin                         | 4224     | 150        | <b>3.43</b> |
|         | 7-2           | 7039B  | fib (7-1)                    | 5181     | 193        | <b>3.59</b> |
|         | 7-3           | 7038B  | fib (7-5)                    | 7844     | 2          | 0.03        |
|         | 7-4           | 6802   | saliva                       | 5426     | 6          | 0.11        |
|         | 7-5           | 7038A  | bone marrow                  | 4679     | 47         | 0.99        |
| 8*      | 8-1           | 6839   | blood                        | 21600    | 109        | 0.50        |
|         | 8-2           | 6840   | colon <sup>c</sup>           | 19853    | 1624       | <b>7.56</b> |
|         | 8-3           | 6841   | cecum <sup>c</sup>           | 20179    | 2042       | <b>9.19</b> |
|         | 8-4           | 6843   | bone <sup>c</sup>            | 859      | 0          | 0           |
|         | 8-5           | 6842   | thumb <sup>c</sup>           | 8233     | 0          | 0           |
| 9       | 9-1           | 6984   | blood                        | 13168    | 12         | 0.09        |
|         | 9-2           | 7314   | saliva                       | 58987    | 24         | 0.04        |
| 10*     | 10-1          | 7634   | skin                         | 143303   | 71845      | <b>33.4</b> |
|         | 10-2          | 7638   | fib (10-1)                   | 169197   | 32719      | <b>16.2</b> |
| Control | 11-1          | 6985   | blood                        | 5599     | 2          | 0.04        |
|         | 11-2          | 6986   | blood                        | 3028     | 1          | 0.03        |
|         | 11-3          | 7002   | saliva                       | 54728    | 6          | 0.01        |

\*Mutation positive; Samples quantified as containing >1% of the c.1234T allele are denoted in bold; <sup>a</sup>Sample used in exome sequencing; <sup>b</sup>Tissue source of DNA, sample ID in brackets indicates the skin sample from which fibroblasts were cultured. DNA was extracted from peripheral blood, saliva and a minimum of three 10 µm FFPE sections using Nucleon BACC3, Oragene-DNA (DNA Genotek) and Qiagen DNA FFPE tissue kits, respectively. DNA from all other tissue was obtained by homogenization, followed by overnight proteinase K treatment, phenol-chloroform extraction and DNA precipitation. The starting tissue from which fibroblast (fib) cultures were derived is indicated in brackets. <sup>c</sup>FFPE samples.



**Table S3. Primers and amplification conditions used for genetic analysis of *SMO***

| <b>Amplification of <i>SMO</i> exon 6 for dideoxy sequencing<sup>a</sup></b>                                                                                 |                                                                  |                                                           |                                       |
|--------------------------------------------------------------------------------------------------------------------------------------------------------------|------------------------------------------------------------------|-----------------------------------------------------------|---------------------------------------|
| Amplicon                                                                                                                                                     | Primer sequence 5'→3'                                            |                                                           | Product size (bp)                     |
|                                                                                                                                                              | Forward                                                          | Reverse                                                   |                                       |
| <i>SMO</i> exon 6                                                                                                                                            | caggtggatgggactctgtgagtgg                                        | ttcgtctgctagagggtcaccttctact                              | 285                                   |
| <b>Deep sequencing – 1<sup>st</sup> round amplification of <i>SMO</i><sup>b</sup></b>                                                                        |                                                                  |                                                           |                                       |
| Amplicon                                                                                                                                                     | Primer sequence 5'→3'                                            |                                                           | Product size (bp), not including tags |
|                                                                                                                                                              | Forward (tag lowercase, gene-specific sequence uppercase)        | Reverse (tag lowercase, gene-specific sequence uppercase) |                                       |
| Exon 1-1                                                                                                                                                     | cgctttccgatctctgGCTTTGCTGAGTTGGCGG                               | tgctttccgatctgacCCAGTCACCGCCGCGC                          | 194                                   |
| Exon 1-2                                                                                                                                                     | cgctttccgatctctgGGCGGGAGCGCGAGGA                                 | tgctttccgatctgacACCAGAGCACGAGCTTGCCGT                     | 196                                   |
| Exon 1-3                                                                                                                                                     | cgctttccgatctctgACTCGGACTCCCAGGAGGAAG                            | tgctttccgatctgacGCACGTAACCTGCCCCAAAG                      | 204                                   |
| Exon 2-1                                                                                                                                                     | cgctttccgatctctgAGGTCTGACCAGTGTATGGGCT                           | tgctttccgatctgacACCCGGTCATTCTCACACTTG                     | 200                                   |
| Exon 2-2                                                                                                                                                     | cgctttccgatctctgGATCCAGCCCTGCTGTGTGC                             | tgctttccgatctgacCAACCAGAGAGCCTGGACC                       | 215                                   |
| Exon 3-1                                                                                                                                                     | cgctttccgatctctgCGTCCCTGAGCTGCCTTGAC                             | tgctttccgatctgacTGTAGCTGTGCATGTCCTGGT                     | 210                                   |
| Exon 3-2                                                                                                                                                     | cgctttccgatctctgGCCAGAACCCGCTTTCACAGA                            | tgctttccgatctgacATCATGACCCTCCCTGGGGA                      | 211                                   |
| Exon 4-1                                                                                                                                                     | cgctttccgatctctgCAGGGAAGGGTCATGATCAGA                            | tgctttccgatctgacCAATGCTGCCACAAAGAAGC                      | 193                                   |
| Exon 4-2                                                                                                                                                     | cgctttccgatctctgGAATCGTACCCTGCTGTTATTCTC                         | tgctttccgatctgacCACACTTCAGCCTTCCTCCCTG                    | 198                                   |
| Exon 5-1                                                                                                                                                     | cgctttccgatctctgGAACCTCCAGACCTCAGCAGC                            | tgctttccgatctgacCTTTGAAGGAAGTGTGCCAGGC                    | 218                                   |
| Exon 5-2                                                                                                                                                     | cgctttccgatctctgGGTTTGGTTGTGGTCCtacc                             | tgctttccgatctgacCCCTCCCTCAAACCTCACCC                      | 208                                   |
| Exon 6                                                                                                                                                       | cgctttccgatctctgAGTAACCCACCTTCTGTCCCA                            | tgctttccgatctgacCCAACCTGGTCTGGCCTGGT                      | 191                                   |
| Exon 7                                                                                                                                                       | cgctttccgatctctgCTACCCCTGCTAATGTCTGA                             | tgctttccgatctgacGGTCGCATAGCCCCAGGA                        | 206                                   |
| Exon 8                                                                                                                                                       | cgctttccgatctctgGACTCTCTCCTCCCCACTGCTG                           | tgctttccgatctgacCCGCCTCCATGCCCTCA                         | 203                                   |
| Exon 9-1                                                                                                                                                     | cgctttccgatctctgTGGGTGACAGAGCAAGATCCT                            | tgctttccgatctgacGTTCCAAACATGGCAAACAGGT                    | 203                                   |
| Exon 9-2                                                                                                                                                     | cgctttccgatctctgGCCTTCTGGTGGAGAAGATCA                            | tgctttccgatctgacTAGAGGCAGGACCCGACAAAA                     | 201                                   |
| Exon 10-1                                                                                                                                                    | cgctttccgatctctgAGAGAAGGCCTCTACTCCTGAGTCC                        | tgctttccgatctgacGGCAATCATCTTGCTCTTCTTGATC                 | 206                                   |
| Exon 10-2                                                                                                                                                    | cgctttccgatctctgGCAGAGTGACGATGAGCCAAAG                           | tgctttccgatctgacTGCCCCAGCAGGCTGG                          | 220                                   |
| Exon 11                                                                                                                                                      | cgctttccgatctctgGACCGGGAAGTCACTTCCCTTC                           | tgctttccgatctgacCCCACCTTCCTCCAGAAGCT                      | 217                                   |
| Exon 12-1                                                                                                                                                    | cgctttccgatctctgGCATGGACAGAGCCAGGGC                              | tgctttccgatctgacGGTACTGGGGCAGGGGCA                        | 214                                   |
| Exon 12-2                                                                                                                                                    | cgctttccgatctctgCGCCTGGGCCGGAAGAAG                               | tgctttccgatctgacGGGCTCTGGGCAGAATGGG                       | 222                                   |
| Exon 12-3                                                                                                                                                    | cgctttccgatctctgGGGAGCTGGGGACTCTTGCT                             | tgctttccgatctgacCTTTTCTGTCCAGGTCCTGC                      | 240                                   |
| <b>Deep sequencing – 2<sup>nd</sup> round amplification of <i>SMO</i> fragments to incorporate barcodes and Ion Torrent PGM-specific primers<sup>c</sup></b> |                                                                  |                                                           |                                       |
| Barcoding PCR                                                                                                                                                | Primer sequence 5'→3'                                            |                                                           | Product size (bp)                     |
|                                                                                                                                                              | Forward (PGM-A sequence uppercase, 10 bp barcode, tag lowercase) | Reverse (PGM-P1 sequence uppercase, tag lowercase)        |                                       |
|                                                                                                                                                              | CCATCTCATCCCTGCGTGTCTCCGACTCAGxxxxxxxxxcgctttccgatctctg          | CCTCTCTATGGGCAGTCGGTGATtgctttccgatctgac                   | 288-337                               |

Note.—<sup>a</sup>DNA amplification was performed in a total volume of 20  $\mu$ l containing 15 mM TrisHCl (pH 8.0), 50 mM KCl, 2.5 mM MgCl<sub>2</sub>, 100  $\mu$ M each dNTP, 0.4  $\mu$ M primers, and 0.5 units of FastStart polymerase (Roche). Cycling conditions consisted of an 8 min denaturation step at 94°C, followed by 35 cycles of 94°C for 30 s, 68°C for 30 s and 72°C for 30s, with a final extension at 72°C for 10 min.

<sup>b</sup>The entire *SMO* coding region was amplified using tagged primers to generate products of approximately 200 bp (some exons required overlapping amplicons). Reactions used 0.02 U/ $\mu$ l of high fidelity Taq polymerase Q5 (NEB) in a volume of 25  $\mu$ l containing, 40 ng DNA, 0.5  $\mu$ M primers, 25 mM Tap-HCl (pH 9.3), 50 mM KCl, 2 mM MgCl<sub>2</sub>, 1 mM  $\beta$ -mercaptoethanol and 200  $\mu$ M each dNTP. Cycling consisted of 30 s of denaturation at 98°C, followed by 15 cycles of 98°C for 10 s, 64°C for 20 s with a 0.5°C decrease each cycle and 72°C for 30s, and then a further 15 cycles of 98°C for 10 s, 57°C for 20 s and 72°C for 30s, with a final extension at 72°C for 2 min.

<sup>c</sup>Amplification products were diluted 1/100 and 2  $\mu$ l used in a second round PCR, with a common reverse primer including the Ion Torrent PGM P1 adapter, and forward primers with Illumina 10 bp barcodes (to differentiate samples) and the Ion Torrent A adapter sequence. Reactions were set up as above in the first round PCR; cycling consisted of a 30 s denaturation step at 98°C, followed by 9 cycles of 98°C for 10 s, 60°C for 30 s and 72°C for 30s, with a final extension at 72°C for 2 min. Amplification products (roughly equal amounts as judged by EtBr staining in agarose gels) were combined and then purified with AMPure beads (Beckman Coulter). Emulsion PCR and enrichment was performed with the Ion PGM Template OT2 200 Kit (Life Technologies) according to the manufacturer's instructions. Sequencing of enriched templates was carried out on the Ion Torrent PGM (Life Technologies) for 125 cycles using the Ion PGM Sequencing 200 kit v2 and Ion 314 or 316 chips. Data were processed with Ion Torrent platform-specific pipeline software v4.2.1.

**Table S4 Deep sequencing of *SMO* in trichoblastoma and nevus sebaceus (NS) samples**

|                |        | <i>SMO</i> c.1234C>T |          |            | Analysis of entire <i>SMO</i> coding region |                  |                |                                                            |
|----------------|--------|----------------------|----------|------------|---------------------------------------------|------------------|----------------|------------------------------------------------------------|
|                | Sample | C allele             | T allele | % T allele | Av reads all amplicons                      | Av base coverage | Min read depth | Variants with <1% minor allele frequency                   |
| Trichoblastoma | 1      | 5257                 | 2        | 0.04       | 2730                                        | 2042             | 217            |                                                            |
|                | 2      | 3790                 | 7        | 0.18       | 2244                                        | 1586             | 136            |                                                            |
|                | 3      | 3819                 | 20       | 0.52       | 1712                                        | 1182             | 83             |                                                            |
|                | 4      | 3004                 | 3        | 0.10       | 1463                                        | 1017             | 75             |                                                            |
|                | 5      | 3334                 | 6        | 0.18       | 1695                                        | 1106             | 142            | rs201383344 (5' end intron 3)                              |
|                | 6      | 201                  | 1        | 0.50       | 998                                         | 595.9            | 48             |                                                            |
|                | 7      | 3733                 | 2        | 0.05       | 1376                                        | 982.3            | 99             |                                                            |
|                | 8      | 4303                 | 2        | 0.05       | 847                                         | 621.2            | 164            |                                                            |
|                | 9      | 2433                 | 3        | 0.12       | 1177                                        | 778.7            | 160            |                                                            |
|                | 10     | 11237                | 9        | 0.08       | 4275                                        | 3098             | 645            | rs201383344                                                |
|                | 11     | 14904                | 7        | 0.05       | 1303                                        | 905.8            | 9              | rs193242977; intronic homozygous G>A at 128,843,165 (hg19) |
|                | 12     | 2324                 | 0        | 0          | 872                                         | 590.4            | 62             |                                                            |
|                | 13     | 5206                 | 16       | 0.31       | 1341                                        | 925.8            | 156            |                                                            |

|    |    |      |   |      |      |      |     |  |
|----|----|------|---|------|------|------|-----|--|
|    | 14 | 4394 | 3 | 0.07 | 1702 | 1177 | 177 |  |
| NS | 1  | 3200 | 1 | 0.03 | 1653 | 1159 | 246 |  |

**Table S5 Comparison of brain imaging in Subjects 5, 6 and 8**

|                                                             | <b>Subject 5</b> | <b>Subject 6</b> | <b>Subject 8</b> |
|-------------------------------------------------------------|------------------|------------------|------------------|
| <b>Brain malformation</b>                                   |                  |                  |                  |
| Occipitofrontal circumference                               | +3 SD            | +4 SD            | -0.2 SD          |
| Cerebral asymmetry (or HMEG)                                | moderate         | none             | mild             |
| Polymicrogyria (or FCD type 2)                              | +++              | ++               | +                |
|                                                             | L HMEG           | PMG in FL        | PMG R-PS         |
| Ventriculomegaly (or hydrocephalus)                         | +                | ++               | n                |
| Agenesis of the corpus callosum                             | partial          | partial          | partial          |
| Thalamic cyst                                               | n                | y                | n                |
| Meningocele                                                 | y                | n                | n                |
| Chiari malformation type 1                                  | y                | y                | n                |
| Medulloblastoma in cerebellum and 4 <sup>th</sup> ventricle | y                | n                | n                |

Note.—abbreviations used: HMEG, hemimegalencephaly; FCD, focal cortical dysplasia; PMG, polymicrogyria; FL, frontal lobe; R-PS, right perisylvian region; y, yes; n, no.
